## ANESTHESIOLOGY

# Persistent Incisional Pain after Noncardiac Surgery: An International Prospective Cohort Study

James S. Khan, M.D., M.Sc., Daniel I. Sessler, M.D., Matthew T. V. Chan, M.B., B.S., Ph.D., C. Y. Wang, M.B.Ch.B., F.R.C.A., Ignacio Garutti, M.D., Ph.D., Wojciech Szczeklik, M.D., Ph.D., Alparslan Turan, M.D., Jason W. Busse, D.C., Ph.D., D. Norman Buckley, M.D., James Paul, M.D., M.Sc., Michael McGillion, R.N., Ph.D., Carmen Fernández-Riveira, M.D., Ph.D., Sadeesh K. Srinathan, M.D., Harsha Shanthanna, M.D., Ph.D., Ian Gilron, M.D., M.Sc., Michael Jacka, M.D., M.B.A., Paul Jackson, B.Sc., M.Sc., M.S., M.D., James Hankinson, M.D., Pilar Paniagua, M.D., Ph.D., Shirley Pettit, R.N., P. J. Devereaux, M.D., Ph.D.

*ANESTHESIOLOGY* 2021; 135:711–23

## EDITOR'S PERSPECTIVE

### What We Already Know about This Topic

- Persistent pain after surgery is common, limits functional recovery, and contributes to psychologic distress
- Most studies examining persistent postoperative pain have been small and involved limited time frames

### What This Article Tells Us That Is New

- Incisional pain persisting for up to 1 yr after major noncardiac surgery was assessed prospectively in a cohort of more than 14,000 patients
- Persistent incisional pain was identified in 3.3% of the patients, with nearly half reporting moderate to severe pain
- Several risk factors, including female sex, history of chronic pain, coronary heart disease, and others, were identified

## ABSTRACT

**Background:** The purpose of this study was to determine the incidence, characteristics, impact, and risk factors associated with persistent incisional pain. The hypothesis was that patient demographics and perioperative interventions are associated with persistent pain.

**Methods:** This was a secondary analysis of an international prospective cohort study from 2012 to 2014. This study included patients who were 45 yr of age or older who underwent major inpatient noncardiac surgery. Data were collected perioperatively and at 1 yr after surgery to assess for the development of persistent incisional pain (pain present around incision at 1 yr after surgery).

**Results:** Among 14,831 patients, 495 (3.3%; 95% CI, 3.1 to 3.6) reported persistent incisional pain at 1 yr, with an average pain intensity of  $3.6 \pm 2.5$  (0 to 10 numeric rating scale), with 35% and 14% reporting moderate and severe pain intensities, respectively. More than half of patients with persistent pain reported needing analgesic medications, and 85% reported interference with daily activities (denominator = 495 in the above proportions). Risk factors for persistent pain included female sex ( $P = 0.007$ ), Asian ethnicity ( $P < 0.001$ ), surgery for fracture ( $P < 0.001$ ), history of chronic pain ( $P < 0.001$ ), coronary artery disease ( $P < 0.001$ ), history of tobacco use ( $P = 0.048$ ), postoperative patient-controlled analgesia ( $P < 0.001$ ), postoperative continuous nerve block ( $P = 0.010$ ), insulin initiation within 24 h of surgery ( $P < 0.001$ ), and withholding nonsteroidal anti-inflammatory medication or cyclooxygenase-2 inhibitors on the day of surgery ( $P = 0.029$  and  $P < 0.001$ , respectively). Older age ( $P < 0.001$ ), endoscopic surgery ( $P = 0.005$ ), and South Asian ( $P < 0.001$ ), Native American/Australian ( $P = 0.004$ ), and Latin/Hispanic ethnicities ( $P < 0.001$ ) were associated with a lower risk of persistent pain.

**Conclusions:** Persistent incisional pain is a common complication of inpatient noncardiac surgery, occurring in approximately 1 in 30 adults. It results in significant morbidity, interferes with daily living, and is associated with persistent analgesic consumption. Certain demographics, ethnicities, and perioperative practices are associated with increased risk of persistent pain.

(*ANESTHESIOLOGY* 2021; 135:711–23)

Surgery appears to be a major cause of chronic pain, as 22% of patients seeking care at a chronic pain clinic attribute their pain to a surgical procedure.<sup>1</sup> Persistent postsurgical pain has been defined as the presence of pain after the usual healing time of surgery (3 months), localized to the surgical incision or referred pattern of pain (e.g., along a nerve distribution or dermatome), and not due

This article has a visual abstract available in the online version.

Submitted for publication December 8, 2020. Accepted for publication July 14, 2021. From the Department of Anesthesia and Pain Medicine, University of Toronto, Toronto, Ontario, Canada (J.S.K.); the Department of Outcomes Research (D.I.S., A.T.) and the Department of General Anesthesia (A.T.), Anesthesiology Institute, Cleveland Clinic, Cleveland, Ohio; the Department of Anaesthesia and Intensive Care, Chinese University of Hong Kong, Hong Kong Special Administrative Region, China (M.T.V.C.); the Department of Anaesthesiology, Faculty of Medicine, University of Malaya, Kuala Lumpur, Malaysia (C.Y.W.); the Department of Anesthesiology and Critical Care, Hospital General Universitario Gregorio Marañón, Madrid, Spain (I.G.); the Department of Medicine and Pharmacology, Complutense University of Madrid, Madrid, Spain (I.G.); the Center for Intensive Care and Perioperative Medicine, Jagiellonian University Medical College, Krakow, Poland (W.S., C.F.-R.); the Department of Anesthesia (J.W.B., D.N.B., J.P., H.S., P.J., J.H.), the Michael G. DeGroot Institute for Pain Research and Care (D.N.B.), the School of Nursing (M.M.), and the Departments of Health Research Methods (P.J.D.) and Medicine (P.J.D.), McMaster University, Hamilton, Ontario, Canada; the Population Health Research Institute, Hamilton, Ontario, Canada (M.M., P.J.D.); the Department of Surgery, University of Manitoba, Winnipeg, Manitoba, Canada (S.K.S., S.P.); the Department of Anesthesiology and Perioperative Medicine, Queen's University, Kingston, Ontario, Canada (I.G.); the Department of Critical Care, School of Medicine, University of Alberta, Edmonton, Alberta, Canada (M.J.); and the Biomedical Research Institute Sant Pau, Barcelona, Spain (P.P.).

Copyright © 2021, the American Society of Anesthesiologists. All Rights Reserved. *Anesthesiology* 2021; 135:711–23. DOI: 10.1097/ALN.0000000000003951

to any organic cause of pain (*i.e.*, infection, malignancy).<sup>2</sup> Because chronic pain is often refractory to treatment, efforts have been directed toward identifying preventative therapies within the perioperative period.<sup>3</sup> Unfortunately, no definitive interventions have been identified, and chronic postsurgical pain continues to be a significant source of long-term physical, psychologic, emotional, and social distress.<sup>4</sup> Chronic pain contributes to concurrent depression and anxiety, and 10% of patients with chronic pain will attempt suicide.<sup>5–9</sup> Economic hardships are common in those with chronic pain due to disability and reduced work productivity.<sup>10</sup> Additionally, chronic opioid use is associated with long-term morbidities (overdose, tolerance, hyperalgesia), and surgery and trauma are responsible for chronic opioid use in 2.6% of opioid-naïve adults.<sup>11</sup>

Although surgery is known to be a trigger for chronic pain, there is substantial variation in the reported incidences of persistent pain after noncardiac surgery. The majority of studies have been conducted within specific surgical populations and provide estimates ranging from 0 to 60%.<sup>12,13</sup> Variation is likely due to a number of factors including differences in regional surgical and perioperative practices, small sample sizes (100 to 300 patients), time of outcome assessment after surgery, and inconsistent definitions.<sup>2</sup>

Using data from a large, international, prospective cohort study (the Vascular Events in Noncardiac Surgery Patients Cohort Evaluation [VISION] Study; clinicaltrials.gov identifier NCT00512109), we aimed to identify the incidence, characteristics, impact, and risk factors associated with the development of persistent incisional pain after noncardiac surgery. Our hypotheses for this analysis were that demographics and perioperative pain interventions would influence the risk of developing persistent pain.

## Materials and Methods

### The VISION Study

VISION was an international, prospective cohort study of 40,004 patients who underwent noncardiac surgery between August 2007 and February 2014 in 28 centers in North and South America, Africa, Asia, Australia, and Europe.<sup>14</sup> The primary aim of VISION was to determine the incidence of myocardial injuries and major vascular complications after noncardiac surgery. During the conduct of VISION, we developed a substudy to evaluate persistent incisional pain at 1 yr after surgery. This substudy and accompanying data collection started in June 2012 and included all patients that were alive and able to provide 1-yr follow-up data.

Eligible patients were identified by screening daily patient lists (in preoperative assessment clinics, surgical wards, and intensive care units), screening daily and previous-day surgical lists, and assessing patients in the preoperative holding area on the day of surgery. Patients provided written informed consent to participate in the study (VISION)

and associated substudies before undergoing surgery. For those unable to provide consent before surgery (*i.e.*, emergency surgery), consent was obtained within 24 h after surgery. Eight centers used a deferred consent process for patients unable to provide consent (*e.g.*, patients who were sedated or mechanically ventilated) when no next of kin was available.

Patients were included into VISION if they were 45 yr of age or more, had noncardiac surgery, and received a general or regional anesthetic. Patients were excluded from the study if they did not require at least an overnight hospital admission after surgery, received only local infiltration (*i.e.*, local anesthesia), were previously enrolled in VISION, or did not provide informed consent. Research ethics board/institutional review board approval was obtained from each participating site. Details on patient enrollment, data collection, and follow-up in VISION has been published previously.<sup>14</sup>

At the time of enrollment, patient information was collected including demographics, past medical history, medications, indications for surgery, and history of chronic pain. Research personnel also collected information regarding the type of surgery, anesthetic technique, and perioperative medications. At the 1-yr follow-up, the diagnosis of persistent incisional pain was made by asking patients about the presence of pain localized to their surgical incision that was not present before surgery or caused by any other known cause such as infection or malignancy. This assessment was typically performed *via* a telephone follow-up interview. Those who reported the presence of persistent pain were further assessed for neuropathic pain characteristics, use of pain medications, severity of pain at its worst and least, average pain (over the last 24 h), pain at time of interview using the numeric rating scale (0 to 10, where 0 is no pain and 10 is worst possible pain), interference of pain on aspects of daily living, whether an analgesic medication was used to manage their pain (did not specify whether opioid or nonopioid analgesic), and neuropathic pain characteristics. Assessment of neuropathic pain characteristics was performed by asking patients to gently rub the skin around their surgical incision and rate the presence of neuropathic characteristics (*e.g.*, tingling, numbness, increased pain caused by light touch [allodynia]) using a 0 to 10 scale. Research personnel at each site submitted patient data on case report forms directly to an online data management system (iDataFax, McMaster University, Hamilton, Ontario, Canada). Data monitoring occurred through the use of iDataFax data system checks, statistical monitoring, and on-site monitoring for all participating centers.

### Statistical Analysis

An *a priori*, written, date-stamped (November 14, 2018) statistical analysis plan was recorded in the investigators' files before accessing the study data. All patients who were asked about persistent incisional pain at the 1-yr follow-up were

included in our analysis. We expressed the incidence of persistent incisional pain, across all patients and per specific surgery subgroup, as a percentage of patients affected over the total number of patients at follow-up assessed with a 95% CI. We reported the mean and SD of continuous variables and the number of occurrences with proportions represented as percentages for categorical variables (neuropathic pain features, interference on aspects of daily living, those taking a medication to treat their pain). We also reported those who were taking a medication to treat their pain at 1 yr and then identified the level of interference between those who were and were not taking a pain medication.

We conducted univariate analyses on baseline patient demographics between the entire sample and those reporting persistent pain (table 1), using a *t* test for continuous variables and chi-square test for categorical variables. Two separate multivariable logistic regression models were planned *a priori* to identify preoperative and perioperative risk factors associated with the development of persistent incisional pain. Variables chosen for inclusion in these models were selected *a priori* based on clinical suspicion and biologic plausibility (described in our statistical analysis plan). Preoperative variables included patient demographics (*i.e.*, age [in decades], sex, body mass index, ethnicity [eight categories], comorbidities [*i.e.*, a history of diabetes, chronic pain, tobacco use, coronary artery disease, peripheral vascular disease, or active cancer]) and indications for surgery (*i.e.*, surgery for fracture). We defined a preoperative history of chronic pain as daily pain for 3 months or more during which patients were taking one more of the following pain medications daily: tricyclic antidepressants, anticonvulsants, or opioids other than codeine. Perioperative variables included preoperative medications (*i.e.*, aspirin, insulin, oral

hypoglycemic drugs, cyclooxygenase-2 inhibitors, nonsteroidal anti-inflammatories) taken within 24 h and the previous 7 days, within 24 h only, and within 7 days only but not within 24 h before surgery; intraoperative anesthetic technique (*i.e.*, spinal or epidural anesthesia, regional anesthetic block, use of nitrous oxide); postoperative pain management modalities (*i.e.*, epidural, patient-controlled analgesia [PCA], postoperative continuous nerve block, intramuscular or intravenous opioids); and whether the surgery was open or endoscopic. We excluded independent variables with fewer than 50 observations per category unless we were able to collapse them with other related variables to exceed this threshold. The dependent variable in both models was persistent incisional pain at 1 yr after surgery. The number of variables included in the model was limited to the number of events of incisional pain using a ratio of 10 events for every variable included to ensure model stability and reduce overfitting.<sup>15</sup> All variables were included into the model using forced simultaneous entry, and the reported estimates were adjusted (controlling for other variables in the model) to identify the independent effects of each variable. We tested for collinearity using the variance inflation factor, and if two variables were highly correlated (a variance inflation factor greater than 5), the least significant variable (lower coefficient) was dropped from the model.<sup>16</sup> The goodness of fit of the logistic regression models was assessed using the Hosmer–Lemeshow test.<sup>17</sup> Missing data were handled by using only cases with complete data.

We reported adjusted odds ratios along with their 95% CIs for all independent factors assessed in our regression models including absolute risk increase or reductions for each significant predictor. Baseline risk for persistent postsurgical incisional pain was determined by calculating the

**Table 1.** Patient Characteristics of Total Sample and Those with Persistent Incisional Pain

| Variables                                    | Total Sample (n = 14,831) | Persistent Incisional Pain (n = 495) |
|----------------------------------------------|---------------------------|--------------------------------------|
| Mean age (SD), yr                            | 68.7 (10.9)               | 66.3 (10.2)*                         |
| Sex, male/female, no. (%)                    | 7,288 (49.1)/7,543 (50.9) | 209 (42.2)/286 (57.8)*               |
| Mean body mass index, kg/m <sup>2</sup> (SD) | 27.8 (7.9)                | 28.3 (6.9)                           |
| Diabetes, no. (%)                            | 3,030 (20.4)              | 102 (20.6)                           |
| Active cancer, no. (%)                       | 2,081 (14.0)              | 60 (12.1)                            |
| History of tobacco use, no. (%)              | 6,076 (41.0)              | 239 (48.3)*                          |
| Coronary artery disease, no. (%)             | 1,705 (11.5)              | 83 (16.8)*                           |
| Peripheral vascular disease, no. (%)         | 791 (5.3)                 | 32 (6.5)                             |
| History of chronic pain, no. (%)             | 1,500 (10.1)              | 109 (22.0)*                          |
| Surgeries, no (%)                            |                           |                                      |
| General surgeries                            | 2,936 (19.1)              | 97 (19.6)                            |
| Orthopedic surgeries                         | 2,793 (18.8)              | 143 (28.9)*                          |
| Urologic–gynecologic surgeries               | 2,156 (14.5)              | 36 (7.3)*                            |
| Neurosurgery                                 | 817 (5.5)                 | 47 (9.5)*                            |
| Vascular surgery                             | 700 (4.7)                 | 18 (3.6)                             |
| Thoracic surgery                             | 287 (1.9)                 | 14 (2.8)                             |
| Head and neck surgeries                      | 189 (1.3)                 | 7 (1.4)                              |
| Other surgery                                | 5,500 (37.1)              | 152 (30.7)*                          |

\**P* < 0.05 for between-group differences

incidence among surgical patients with removing major significant risk factors. No sample size calculation was performed before this study because it was primarily exploratory in nature and based on available data.

Two *post hoc* sensitivity analyses were conducted. The first sought to assess the potential impact of missing data on the estimate of persistent incisional pain at 1 yr. Multiple imputation was performed across 20 iterations to impute pain data for patients who were missing at 1 yr after surgery. Available baseline data (*i.e.*, *a priori* variables selected to be included in the multivariable regression models and surgical categories) were used in the regression model to impute missing data. Incidence of persistent incisional pain was averaged across the 20 iterations to identify a pooled incidence and 95% CI. The second sensitivity analysis sought to confirm the results of our individual preoperative and perioperative multivariable regression models by constructing a single model that included all predictors

in addition to surgical groups (eight categories). All statistical analyses were performed using SPSS (USA) version 10 software. All tests were two-sided, and significance was defined as  $P < 0.05$ .

## Results

The primary study (VISION) enrolled 40,037 patients of which 33 were excluded from the cohort (fig. 1). At the 1-yr follow-up, 1,353 patients had died, and 6,080 patients were unable to be contacted for follow-up data. Because pain outcomes were only introduced in 2012 (5 yr after the start of the study), 17,740 patients were never asked about pain at their 1-yr follow-up. This resulted in a total of 14,831 patients who were alive and who provided data on persistent pain at the 1-yr point (fig. 1).

The mean age of patients included in the analysis was  $68.7 \pm 10.9$  yr old, 51% were female, 20% had a history

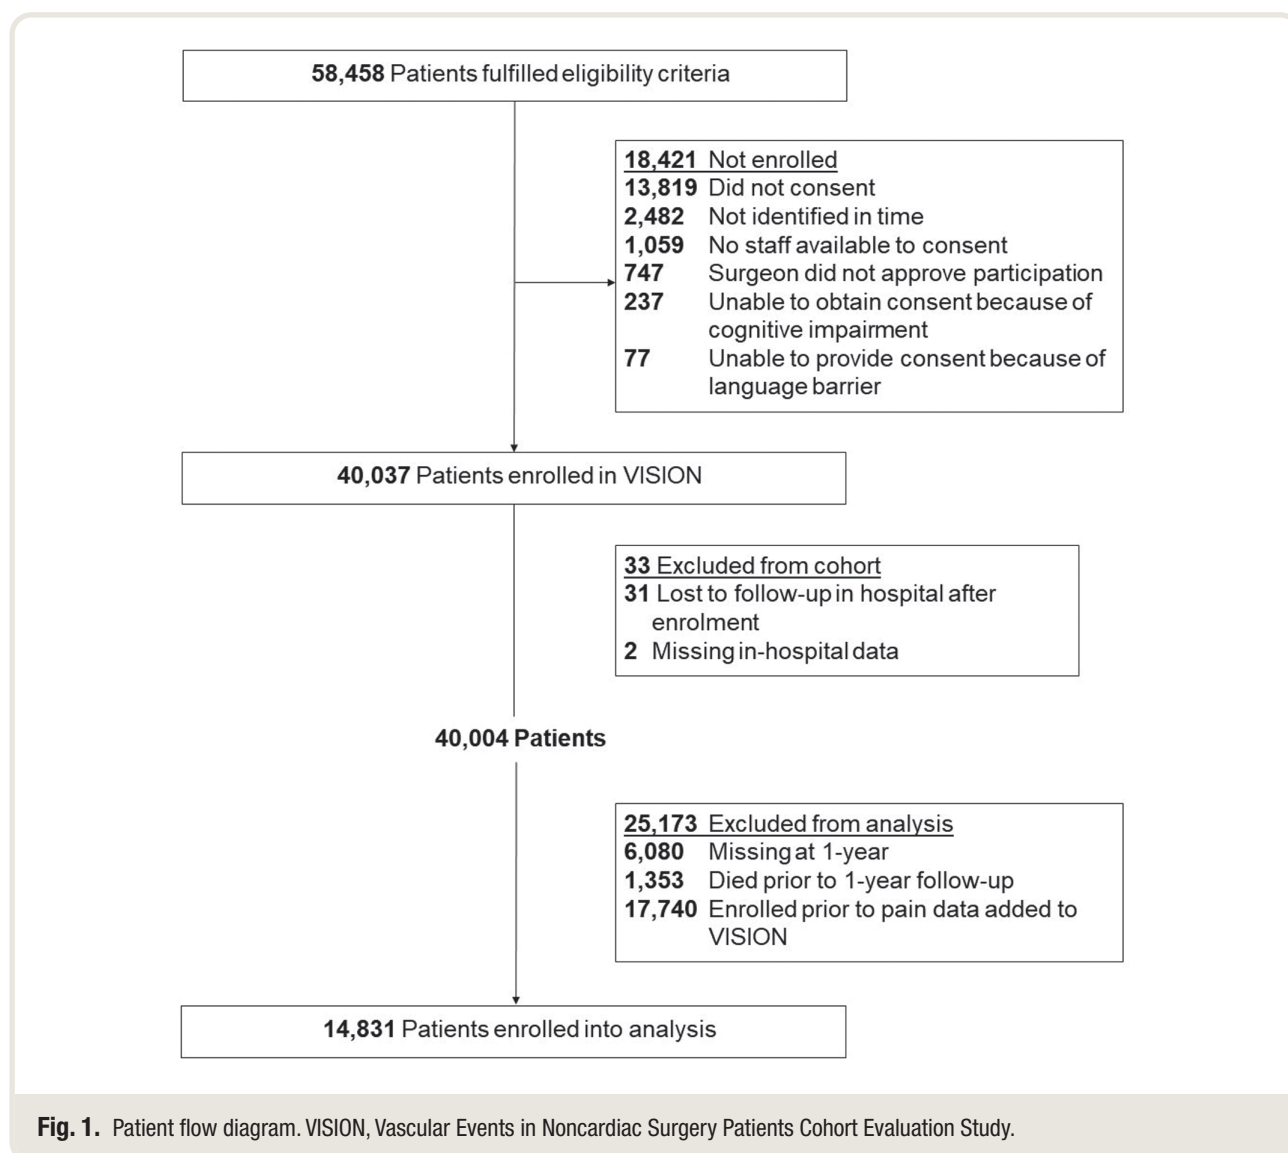

of diabetes, 14% had active cancer, and 41% had a history of tobacco use. Approximately 10% of patients reported chronic pain before surgery. The most common procedures were general surgery (19.1%), orthopedic surgery (18.8%), and urologic–gynecologic surgery (14.5%; table 1).

At 1 yr, 495 patients (3.3%; 95% CI, 3.1 to 3.6%) reported persistent incisional pain. In the univariate analysis (table 1), compared to the entire sample, those with persistent pain were significantly younger; included more females; had a higher rate of tobacco use, coronary artery disease, and history of chronic pain; and had undergone more orthopedic and neurosurgeries and fewer urologic–gynecologic surgeries and other surgeries. The incidence of incisional pain varied across type of surgical subgroups (fig. 2). Pneumonectomies had the highest rate (7.1%) followed by major spine surgery (6.2%), complex visceral resections (6.1%), thoracic aortic reconstructions (5.7%), and other thoracic surgery (5.5%). The incidence of persistent pain in those with a history of chronic pain was 7.3% (95% CI, 6.0 to 8.7%), and those without chronic pain had an incidence of 2.9% (95% CI, 2.6 to 3.2%).

Among participants with persistent incisional pain at 1-yr follow-up, in the previous 24 h, the worst pain was on

average  $5.1 \pm 2.7$ , least pain was  $2.0 \pm 2.3$ , pain on average was  $3.6 \pm 2.5$ , and pain at time of interview was  $2.7 \pm 2.7$  (table 2). With regards to pain intensities over the past 24 h, 51.5% reported mild pain (pain scores 0 to 3), 34.9% reported moderate pain (pain scores 4 to 6), and 13.6% reported severe pain (pain scores 7 to 10; tables 2 and A1). Furthermore, 81% of patients reported one or more features of neuropathic pain characteristics (*i.e.*, tingling, numbness, or allodynia associated with touch around their surgical scar); specifically, 39.6% of patients with incisional pain reported tingling, 47.1% reported numbness, and 57.4% reported allodynia (table A2).

Most patients (85.1%) reported interference of pain on some aspect of their daily living, with the majority of patients reporting some level of interference on specific activities (table 3). The highest interference was reported with walking (scale 0 to 10:  $3.5 \pm 3.7$ ), normal work ( $3.5 \pm 3.4$ ), and general activity ( $3.4 \pm 3.3$ ). Specifically, with respect to interference on general activities, 33.5% reported no interference, 22.2% reported mild interference, 22.5% reported moderate interference, and 21.7% reported severe interference.

Approximately 52.7% of patients with persistent incisional pain reported taking a pain medication specifically

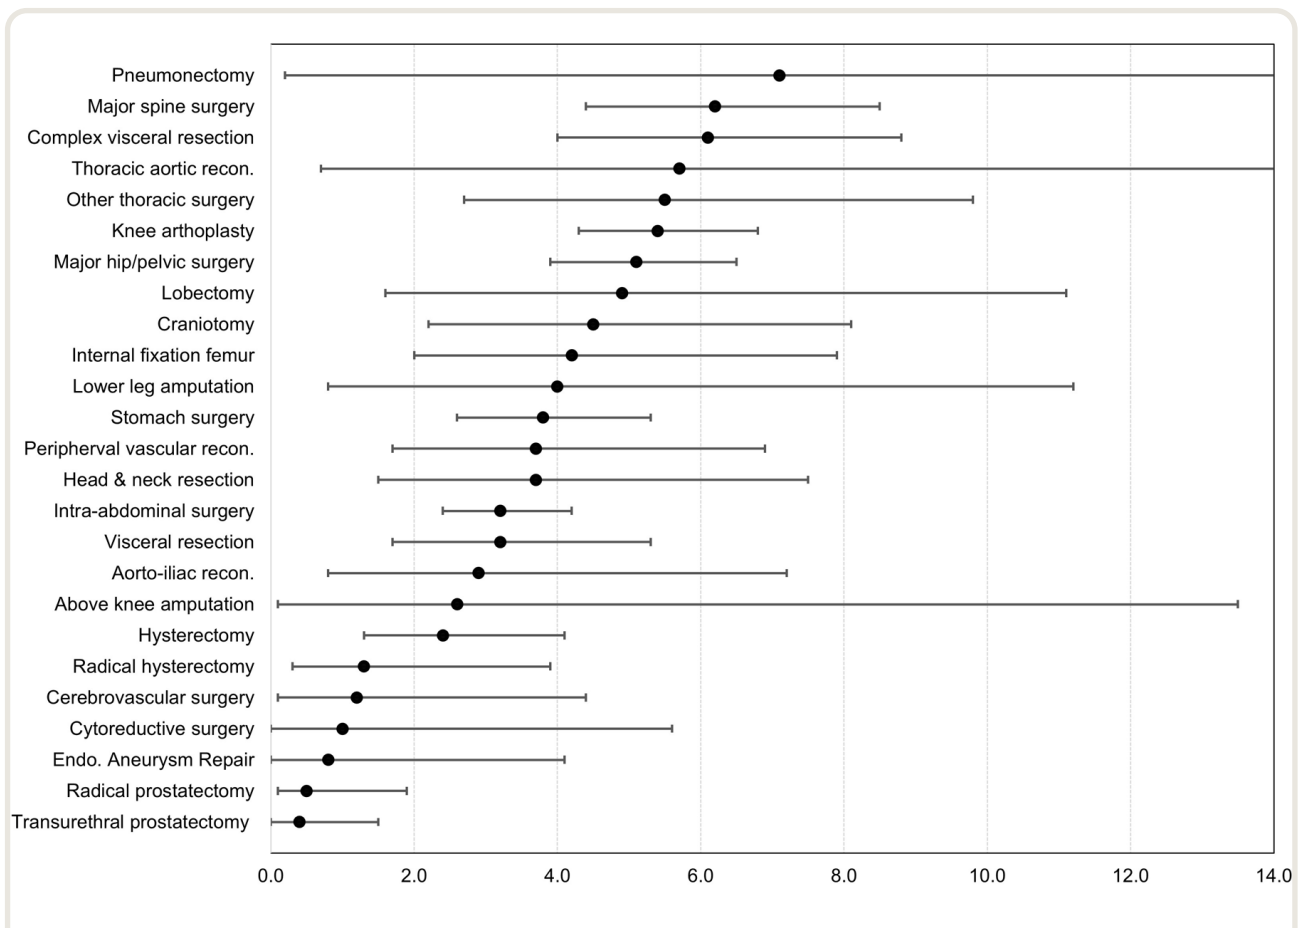

**Fig. 2.** Incidence of persistent incisional pain in specific surgical populations. Error bars indicate 95% CI.



**Table 2.** Pain Intensities Associated with Persistent Incisional Pain (n = 495)

| Pain Scores                               | Values     |
|-------------------------------------------|------------|
| Mean (SD)                                 |            |
| Worst pain (last 24 h)                    | 5.1 (2.7)  |
| Least pain (last 24 h)                    | 2.0 (2.3)  |
| Average pain (last 24 h)                  | 3.6 (2.5)  |
| Pain intensity now (at time of follow-up) | 2.7 (2.7)  |
| No., %                                    |            |
| Mild pain (pain scores 0 to 3)            | 251 (51.5) |
| Moderate pain (pain scores 4 to 6)        | 170 (34.9) |
| Severe pain (pain scores 7 to 10)         | 66 (13.6)  |

Pain scores indicate the patient rating of pain on a numeric rating scale from 0 to 10.

for relief of their incisional pain. Those taking a pain medication suffered significantly greater interference on all aspects of daily living (all  $P < 0.001$ ) compared to those who were not taking pain medication for their incisional pain (table A3).

In the multivariable logistic regression model of preoperative risk factors associated with the development of persistent incisional pain, nine independent predictors were identified: Asian ethnicity (odds ratio, 2.98; 95% CI, 2.36 to 3.76;  $P < 0.001$ ), history of chronic pain (odds ratio, 2.29; 95% CI, 1.82 to 2.88;  $P < 0.001$ ), surgery for fracture (odds ratio, 2.08; 95% CI, 1.43 to 3.02;  $P < 0.001$ ), history of coronary artery disease (odds ratio, 1.89; 95% CI, 1.44 to 2.47;  $P < 0.001$ ), female sex (odds ratio, 1.32; 95% CI, 1.08 to 1.61;  $P = 0.007$ ), history of tobacco use (odds ratio, 1.23; 95% CI, 1.0 to 1.52;  $P = 0.048$ ), age (odds ratio, 0.71 [per decade]; 95% CI, 0.65 to 0.78;  $P < 0.001$ ), South Asian ethnicity (odds ratio, 0.315; 95% CI, 0.210 to 0.473;  $P < 0.001$ ), Native American/Australian ethnicity (odds ratio, 0.303; 95% CI, 0.134 to 0.686;  $P = 0.004$ ), and Latin/Hispanic ethnicity (odds ratio, 0.152; 95% CI, 0.080 to 0.289;  $P < 0.001$ ; table 4).

In the multivariable logistic regression model of perioperative interventions to predict the development of persistent

incisional pain at 1 yr after surgery, six variables were found to be significantly associated (table 5). Only one of these variables were associated with a lower risk of persistent pain, which was endoscopic surgery (odds ratio, 0.71; 95% CI, 0.56 to 0.90;  $P = 0.005$ ). Five variables were associated with increased risk of pain, including (in order of increasing risk): NSAIDs taken 1 to 7 days before surgery but stopped within 24 h of surgery (odds ratio, 1.55; 95% CI, 1.05 to 2.30;  $P = 0.029$ ); postoperative PCA use (odds ratio, 1.92; 95% CI, 1.57 to 2.34;  $P < 0.001$ ); postoperative continuous nerve block use (odds ratio, 2.27; 95% CI, 1.21 to 4.24;  $P = 0.010$ ); cyclooxygenase-2 inhibitors taken 1 to 7 days before surgery but stopped within 24 h of surgery (odds ratio, 2.59; 95% CI, 1.66 to 4.07;  $P < 0.001$ ); and insulin not taken within 1 to 7 days of surgery but given within 24 h of surgery (odds ratio, 3.02; 95% CI, 1.82 to 5.00;  $P < 0.001$ ).

The *post hoc* sensitivity analysis on missing data indicated that the incidence of persistent pain may be slightly higher (3.7%; 95% CI, 3.2 to 4.2%) than our observed incidence rate. The second sensitivity analysis confirmed the significance of all predictors identified in the separate preoperative and perioperative regression models except for endoscopic surgery ( $P = 0.076$ ), history of tobacco use (0.058), and postoperative continuous nerve block ( $P = 0.127$ ; table A4).

## Discussion

In this secondary analysis of a large, international, representative sample of patients who underwent inpatient non-cardiac surgery between 2012 and 2014, approximately 1 in 30 patients reported persistent incisional pain 1-yr after their surgery. Persistent incisional pain is associated with mild-to-moderate pain intensity, neuropathic pain features, interference with aspects of daily living, and persistent analgesic use.

The incidence of persistent incisional pain in our study (3.3%) is lower than most estimates reported in the literature. Although most investigations on persistent pain after surgery have been conducted within specific surgical subgroups, previous studies that included a noncardiac surgical cohort have reported rates greater than 10% at 1 yr postoperatively.<sup>18–20</sup> Several reasons may explain differences between our findings and previous investigations. First, many previous studies have typically not specified the location of persistent pain, whereas our investigation focused on pain around the incisional.<sup>21</sup> For example, persistent pain after breast cancer surgery presents with pain in the chest wall, medial arm, shoulder, or axilla and not necessarily pain at the incision site.<sup>22,23</sup> Similarly, only 15% of patients with persistent pain after inguinal hernia repair report pain in the area of surgery.<sup>24</sup> Second, differences in postoperative follow-up times for outcome assessment after surgery has a drastic impact on the incidence rate detected.<sup>25</sup> For example, in the same cohort of patients who had radical prostatectomies, the incidence rate of persistent pain was 14.3 and 1.2% at the 3- and 6-month

**Table 3.** Interference of Pain on Aspects of Daily Activities in Patients with Persistent Incisional Pain (n = 495)

| Daily Activity              | No. (%)     | Scale 0 to 10, mean (SD)* |
|-----------------------------|-------------|---------------------------|
| General activity            | 325 (66.5%) | 3.4 (3.3)                 |
| Normal work                 | 323 (66.3%) | 3.5 (3.4)                 |
| Walking activity            | 315 (64.5%) | 3.5 (3.7)                 |
| Mood                        | 297 (61.0%) | 2.9 (3.1)                 |
| Sleep                       | 294 (60.4%) | 3.0 (3.3)                 |
| Enjoyment of life           | 284 (58.2%) | 2.8 (3.2)                 |
| Relations with other people | 202 (41.5%) | 2.0 (2.9)                 |

\*Patients reporting some level of interference.

**Table 4.** Adjusted Risks and Odds Ratios of Preoperative Variables to Predict Persistent Incisional Pain (n = 14,831)

|                                        | Frequency in Those<br>with Persistent Pain, % | Absolute Risk Difference<br>(95% CI), % | Adjusted Odds<br>Ratio (95% CI) | P Values |
|----------------------------------------|-----------------------------------------------|-----------------------------------------|---------------------------------|----------|
| Latin/Hispanic ethnicity               | 10 (2.0)                                      | -1.4 (-1.6 to -1.2)                     | 0.152 (0.08 to 0.289)           | < 0.001  |
| Native American/Australian ethnicity   | 6 (1.2)                                       | -1.2 (-1.5 to -0.5)                     | 0.303 (0.134 to 0.686)          | 0.004    |
| South Asian ethnicity                  | 34 (6.9)                                      | -1.2 (-1.3 to -0.9)                     | 0.315 (0.210 to 0.473)          | < 0.001  |
| Age, decades                           | —                                             | -0.5 (-0.6 to -0.4)                     | 0.71 (0.65 to 0.78)             | < 0.001  |
| History of tobacco use                 | 239 (48.5)                                    | 0.4 (0 to 0.9)                          | 1.23 (1.0 to 1.52)              | 0.048    |
| Female sex                             | 286 (57.8)                                    | 0.5 (0.1 to 1)                          | 1.32 (1.08 to 1.61)             | 0.007    |
| History of coronary artery disease     | 83 (16.8)                                     | 1.5 (0.7 to 2.4)                        | 1.89 (1.44 to 2.47)             | < 0.001  |
| Surgery for fracture                   | 36 (7.3)                                      | 1.8 (0.7 to 3.3)                        | 2.08 (1.43 to 3.02)             | < 0.001  |
| History of chronic pain                | 109 (22.0)                                    | 2.1 (1.3 to 3)                          | 2.29 (1.82 to 2.88)             | < 0.001  |
| Asian ethnicity                        | 147 (29.7)                                    | 3.2 (2.2 to 4.4)                        | 2.98 (2.36 to 3.76)             | < 0.001  |
| Body mass index                        | —                                             | 0 (-0.01 to 0.02)                       | 1 (0.99 to 1.01)                | 0.730    |
| Arabic/Persian ethnicity               | 2 (0.4)                                       | -0.8 (-1.5 to 2)                        | 0.54 (0.131 to 2.2)             | 0.386    |
| African ethnicity                      | 23 (4.6)                                      | 0.4 (-0.4 to 1.6)                       | 1.22 (0.77 to 1.95)             | 0.400    |
| Other ethnicity                        | 2 (0.4)                                       | -1.1 (-1.5 to 0.9)                      | 0.37 (0.091 to 1.52)            | 0.169    |
| History of diabetes                    | 102 (20.6)                                    | 0 (-0.3 to 0.5)                         | 1.01 (0.8 to 1.29)              | 0.905    |
| Active cancer                          | 60 (12.1)                                     | -0.2 (-0.6 to 0.3)                      | 0.87 (0.65 to 1.15)             | 0.325    |
| History of peripheral vascular disease | 32 (6.5)                                      | 0 (-0.6 to 0.9)                         | 1.02 (0.66 to 1.56)             | 0.935    |

All variables were included in the final model. The reported estimates were adjusted to identify the independent effects of each variable.

\* $P < 0.05$ .

follow-up, respectively.<sup>26</sup> Given that the majority of studies on persistent postsurgical pain evaluate for pain within 6 months after surgery, with few assessing at follow-up dates 1 yr or later, this may also account for the lower incidence of pain found in our study. Third, VISION was restricted to surgical inpatients and therefore excluded outpatient surgeries that are typically associated with higher rates of persistent pain (e.g., breast surgeries, inguinal hernia surgeries).

Missing data may have also contributed to a lower observed incidence rate. A total of 6,080 patients who were eligible to report on persistent pain were lost to follow-up at 1 yr (30% missing data). Our sensitivity analysis using multiple imputation suggests that the overall incidence may be slightly higher (3.7% *vs.* 3.3%) and that our observed incidence is likely an underestimation.

Our logistic regression models have confirmed previously identified risk factors for persistent pain after noncardiac surgery. Consistent with previous literature, younger age, females, and those with a history of chronic pain are at increased risk of persistent pain after surgery.<sup>12,27–29</sup> We also found that patients undergoing surgery for a fracture had double the risk for developing persistent pain, potentially because of neuronal injuries associated with trauma and the presence of preoperative pain, which is known to be associated with persistent pain.<sup>30,31</sup> Endoscopic surgeries were predictive of less persistent pain, and the mechanism for this may be due to potentially less tissue and neuronal injury compared to open surgeries.<sup>30</sup> A history of tobacco smoking was associated with persistent incisional pain, which is consistent with previous literature identifying tobacco use as a predictor of persistent pain after surgery.<sup>32</sup> However, similar to endoscopic surgeries, the association with tobacco

smoking was not seen in our sensitivity analysis, indicating that these findings are not robust.

We also identified novel risk factors that may be associated with persistent pain. Ethnicity was one of the strongest predictors of persistent pain that we found. Specifically, Asian ethnicity was associated with the highest risk, whereas Latin/Hispanic, Native American/Australian, and South Asian ethnicities had the lowest risk for persistent pain. Racial and ethnic differences in pain thresholds are well documented in experimental pain studies, yet there are limited data on the clinical significance of these differences, particularly in the perioperative setting.<sup>33–39</sup> Furthermore, experimental studies are often conducted within the same geographic region (*i.e.*, all subjects come from the United States),<sup>37</sup> whereas in our sample, the patients were evaluated within their respective countries and continents, and thus any differences could also represent sociocultural variations.

Interestingly, history of coronary artery disease was associated with an increased risk of persistent pain. This is a novel finding, and the mechanism is not entirely clear. In addition, in the same model, peripheral vascular disease was not associated with persistent pain despite the strong overlap with coronary artery disease, suggesting a possible spurious finding or that a link exists that is specific to coronary atherosclerosis. Anti-inflammatory medications (NSAID or cyclooxygenase-2 inhibitors) taken regularly for the previous 7 days preoperatively but discontinued within 24 h of surgery were associated with an increased risk of persistent pain 1 yr later (compared to patients not taking NSAIDs or cyclooxygenase-2 inhibitors at all preoperatively). The mechanism for this is unclear, but it may indicate that patients were taking these medications daily for a pain disorder and that abrupt cessation of these medications led

**Table 5.** Adjusted Risks and Odds Ratios of Perioperative Variables to Predict Persistent Incisional Pain (n = 14,831)

|                                                                                    | Frequency in<br>Those with<br>Persistent Pain, % | Absolute<br>Risk Difference<br>(95% CI), % | Adjusted Odds<br>Ratio (95% CI) | P Values |
|------------------------------------------------------------------------------------|--------------------------------------------------|--------------------------------------------|---------------------------------|----------|
| Endoscopic surgery                                                                 | 91 (18.4)                                        | -0.5 (-0.7 to -0.2)                        | 0.71 (0.56 to 0.9)              | 0.005    |
| NSAID 1 to 7 days preoperative, none less than 24 h preoperative                   | 30 (6.1)                                         | 0.9 (0.1 to 2.1)                           | 1.55 (1.05 to 2.3)              | 0.029    |
| Postoperative PCA                                                                  | 207 (41.9)                                       | 1.5 (0.9 to 2.2)                           | 1.92 (1.57 to 2.34)             | < 0.001  |
| Postoperative continuous nerve block                                               | 13 (2.6)                                         | 2.1 (0.4 to 5.1)                           | 2.27 (1.21 to 4.24)             | 0.010    |
| Cyclooxygenase-2 1 to 7 days preoperative, none less than 24 h preoperative        | 24 (4.8)                                         | 2.6 (1.1 to 4.9)                           | 2.59 (1.66 to 4.07)             | < 0.001  |
| Insulin less than 24 h preoperative, none 1 to 7 days preoperative                 | 25 (5.1)                                         | 3.3 (1.4 to 6.3)                           | 3.02 (1.82 to 5.00)             | < 0.001  |
| Intraoperative nitrous oxide                                                       | 33 (6.7)                                         | -0.5 (-0.9 to 0.1)                         | 0.72 (0.49 to 1.03)             | 0.075    |
| Intraoperative spinal anesthesia                                                   | 129 (26.1)                                       | -0.2 (-0.5 to 0.2)                         | 0.9 (0.72 to 1.13)              | 0.379    |
| Intraoperative regional anesthesia                                                 | 41 (8.3)                                         | 0.1 (-0.5 to 0.8)                          | 1.03 (0.72 to 1.49)             | 0.854    |
| Intraoperative epidural anesthesia                                                 | 57 (11.5)                                        | -0.5 (-0.9 to 0.2)                         | 0.73 (0.48 to 1.1)              | 0.132    |
| Postoperative epidural opioid analgesia                                            | 41 (8.3)                                         | 0.4 (-0.6 to 2.1)                          | 1.21 (0.64 to 2.29)             | 0.553    |
| Postoperative epidural local analgesia                                             | 43 (8.7)                                         | 0.9 (-0.3 to 3)                            | 1.55 (0.83 to 2.87)             | 0.167    |
| Postoperative IM/IV opioids                                                        | 226 (45.8)                                       | 0.1 (-0.2 to 0.4)                          | 1.04 (0.86 to 1.26)             | 0.666    |
| Insulin 1 to 7 days preoperative, none less than 24 h preoperative                 | 4 (0.8)                                          | -0.8 (-1.4 to 0.7)                         | 0.51 (0.188 to 1.41)            | 0.195    |
| Insulin less than 24 h preoperative and 1 to 7 days preoperative                   | 23 (4.6)                                         | 0 (-0.6 to 0.9)                            | 0.99 (0.63 to 1.54)             | 0.963    |
| Aspirin less than 24 h preoperative, none 1 to 7 days preoperative                 | 2 (0.4)                                          | 2.7 (-0.7 to 14.7)                         | 2.63 (0.61 to 11.38)            | 0.195    |
| Aspirin 1 to 7 days preoperative, none less than 24 h preoperative                 | 46 (9.3)                                         | -0.1 (-0.6 to 0.4)                         | 0.92 (0.67 to 1.27)             | 0.616    |
| Aspirin less than 24 h preoperative and 1 to 7 days preoperative                   | 25 (5.1)                                         | 0 (-0.6 to 0.9)                            | 1 (0.66 to 1.53)                | 0.992    |
| Oral hypoglycemia agent less than 24 h preoperative, none 1 to 7 days preoperative | —                                                | -1.7 (-1.7 to -1.7)                        | 0 (0 to 0)                      | 0.998    |
| Oral hypoglycemia agent 1 to 7 days preoperative, none less than 24 h preoperative | 52 (10.5)                                        | 0.4 (-0.2 to 1.3)                          | 1.25 (0.87 to 1.8)              | 0.218    |
| Oral hypoglycemia agent less than 24 h preoperative and 1 to 7 days preoperative   | 21 (4.2)                                         | -0.6 (-1 to 0)                             | 0.63 (0.388 to 1.01)            | 0.054    |
| Cyclooxygenase-2 less than 24 h preoperative, none 1 to 7 days preoperative        | 2 (0.4)                                          | -0.7 (-1.5 to 2.3)                         | 0.59 (0.143 to 2.43)            | 0.466    |
| Cyclooxygenase-2 less than 24 h preoperative and 1 to 7 days preoperative          | 7 (1.4)                                          | 0.4 (-0.8 to 2.9)                          | 1.23 (0.54 to 2.82)             | 0.625    |
| NSAID less than 24 h preoperative, none 1 to 7 days preoperative                   | 27 (5.5)                                         | 0.2 (-0.5 to 1.2)                          | 1.09 (0.69 to 1.73)             | 0.712    |
| NSAID less than 24 h preoperative and 1 to 7 days preoperative                     | 14 (2.8)                                         | -0.6 (-1.1 to 0.2)                         | 0.65 (0.38 to 1.11)             | 0.116    |

All variables were included in the final model. The reported estimates were adjusted to identify the independent effects of each variable.

\* $P < 0.05$ .

IM, intramuscular; IV, intravenous; NSAID, nonsteroidal anti-inflammatory drug; PCA, patient-controlled analgesia.

to increased perioperative pain.<sup>40</sup> Nevertheless, it raises questions about whether anti-inflammatory drugs should be discontinued before surgery in the setting where there are no identifiable contraindications. Furthermore, our model identified that insulin given within 24 h before surgery was associated with an increased risk of persistent pain. Although potentially spurious, there is evidence to suggest that abrupt improvements in glycemic control in the context of chronic hyperglycemia are associated with an increase in neuropathic pain, referred to as insulin neuritis.<sup>41</sup>

Postoperative PCA or continuous nerve catheter infusions appeared to be associated with a significant increase in persistent pain. Most likely, this finding results from confounding. The decision to offer a patient a PCA pump or nerve catheter after surgery is highly influenced by the intensity of their acute pain, and there is ample data to support that acute pain is associated with the development of chronic pain.<sup>42,43</sup> Because we did not collect acute postoperative pain scores, they were not adjusted for in the model, potentially confounding the relationship between PCA/nerve blocks and persistent incisional pain.

There are several limitations to this study. This study utilized the infrastructure of a large multicenter observational study, and for this reason, we were limited in collecting other baseline and perioperative variables that could be associated

with persistent pain (e.g., baseline pain catastrophizing, anxiety, depression, acute postoperative pain scores, persistent opioid use). The lack of pain-specific data available for statistical adjustments could have led to potential confounding in our analysis, as seen with our findings of PCA and continuous nerve blocks with persistent pain. Similarly, we were limited to the main study's follow-up periods (1 yr), preventing collection of pain scores at earlier time points that could inform a pain trajectory analysis.<sup>44</sup> Furthermore, although our outcome assessment included many of the criteria in the recently established International Association for the Study of Pain definition of chronic postsurgical pain (outcome assessment more than 3 months after surgery, not caused by preexisting pain and not caused by other reason [infection, malignancy]),<sup>2</sup> outcome assessment was limited to pain localized to the surgical incision (we did not assess for referred/projected pain to a nerve innervation territory or to a dermatome), and assessment occurred over a telephone follow-up. Given this slight variation in definitions and lack of validity testing, this could be a source of measurement error and bias (over- or underestimating actual incidences). Additionally, although our study included a large sample with multicenter data, it is important to recognize that our estimates are primarily generalizable to adult patients 45 yr old or older (VISION inclusion was limited



to this age group) undergoing inpatient surgical procedures (VISION did not include ambulatory surgeries, many of which are associated with high incidences of chronic post-surgical pain [e.g., breast, inguinal hernia surgeries]).

In conclusion, our findings across a large international cohort of patients suggest that persistent pain is unfortunately a common and problematic complication after surgery. The majority of patients who develop persistent pain will report interference across aspects of daily life, and more than half will seek analgesic use, which can result in increased medication side effects and personal healthcare expenditures. Several demographic and perioperative factors have been identified to be associated with increased risk of persistent pain, and these data can help inform future studies in identifying high-risk patients and randomized trials on whether modification of these risk factors can lead to reduced rates of persistent pain.

### Acknowledgments

The authors thank Li Wang, Ph.D., McMaster University, Hamilton, Ontario, Canada, for her assistance in calculating the absolute risk increases/decreases for significant variables in the multivariable logistic regression models. The authors also thank Pavel Roshanov, M.D., M.Sc., McMaster University, for his assistance in developing figure 1.

### Research Support

Supported by more than 50 grants for VISION and its sub-studies, including six grants from the Canadian Institutes of Health Research (Ottawa, Ontario, Canada), two grants from the Heart and Stroke Foundation of Ontario (Toronto, Ontario, Canada), an Academic Health Science Centers Alternative Funding Plan Innovation Fund grant (Hamilton, Ontario, Canada), a Population Health Research Institute grant (Hamilton, Ontario, Canada), a Clarity Research Group grant (Hamilton, Ontario, Canada), a McMaster University Department of Surgery Surgical Associates research grant (Hamilton, Ontario, Canada), a Hamilton Health Science New Investigator Fund grant (Hamilton, Ontario, Canada), a Hamilton Health Sciences grant (Hamilton, Ontario, Canada), an Ontario Ministry of Resource and Innovation grant (Toronto, Ontario, Canada), a grant from Stryker Canada (Waterdown, Ontario, Canada), two grants from the McMaster University Department of Anesthesiology, two grants from the St. Joseph's Healthcare Department of Medicine (Hamilton, Ontario, Canada), two grants from the Father Sean O'Sullivan Research Center (Hamilton, Ontario, Canada), two grants from the McMaster University Department of Medicine, six summer studentships from Hamilton Health Sciences, a McMaster University Department of Clinical Epidemiology and Biostatistics grant, a McMaster University Division of Cardiology Grant, and a Canadian Network and Center for Trials (Halifax, Nova Scotia,

Canada) international grant (to Dr. Devereaux); by a Winnipeg Health Sciences Foundation operating grant (Winnipeg, Manitoba, Canada), a Diagnostic Services of Manitoba research grant (Winnipeg, Manitoba, Canada), a University of Manitoba Faculty of Dentistry Operational Fund grant (Winnipeg, Manitoba, Canada), Projeto Hospitais de Excelência a Serviço do SUS grant from the Brazilian Ministry of Health in Partnership with the Cardiac Hospital São Paulo-SP (São Paulo, Brazil), a grant from the School of Nursing at the Universidad Industrial de Santander (Santander, Colombia), a grant from the Grupo de Cardiología Preventiva, a grant from the Universidad Autónoma de Bucaramanga (Santander, Colombia), a grant from the Fundación Cardioinfantil Instituto de Cardiología (Bogotá, Colombia), a grant from Alianza Diagnóstica SA (Santander, Colombia), University of Malaya (Kuala Lumpur, Malaysia) Research grant No. RG196/10HTM), and a University of Malaya Penyelidikan Jangka Pendek Grant; and also by Public Policy Research Fund grant No. CUHK-4002-PPR-3 and General Research Fund grant No. 461412 from the Research Grant Council, Hong Kong SAR (Hong Kong, China), and Australian and New Zealand College of Anaesthetists (Melbourne, Australia) grant No. 13/008 (to Dr. Chan). The VISION study funding sources had no role in the design and conduct of this study; collection, management, analysis, and interpretation of the data; and preparation, review, or approval of the article. Dr. Khan is a recipient of a Canadian Institute of Health Research grant unrelated to this study.

### Competing Interests

Drs. Devereaux and McGillion are part of a research group with a policy of not accepting honoraria or other payments from industry for their own personal financial gain. They do accept honoraria/payments from industry to support research endeavors and costs to participate in meetings. Based on study questions Dr. Devereaux has originated and grants he has written, he has received grants from Abbott Diagnostics (Abbott Park, Illinois), Boehringer Ingelheim (Ingelheim am Rhein, Germany), Siemens (Munich, Germany), Philips Healthcare (Amsterdam, The Netherlands), and Roche Diagnostics (Basel, Switzerland). Based on study questions Dr. McGillion has originated and grants he has written, he has received peer-reviewed grants from government funding agencies that include in-kind support from Philips Healthcare, QoC Health (Toronto, Ontario, Canada), xahive (Ottawa, Ontario, Canada), Cloud DX (Kitchener, Ontario, Canada), and ThoughtWire (Toronto, Ontario, Canada). The other authors declare no competing interests.

### Correspondence

Address correspondence to Dr. Khan: 600 University Avenue, Room 20-400, Toronto, Ontario M5G 1X5,

Canada. james.khan@medportal.ca. ANESTHESIOLOGY's articles are made freely accessible to all readers on www.anesthesiology.org, for personal use only, 6 months from the cover date of the issue.

## References

- Crombie IK, Davies HT, Macrae WA: Cut and thrust: Antecedent surgery and trauma among patients attending a chronic pain clinic. *Pain* 1998; 76:167–71
- Schug SA, Lavand'homme P, Barke A, Korwisi B, Rief W, Treede RD; IASP Taskforce for the Classification of Chronic Pain: The IASP classification of chronic pain for ICD-11: Chronic postsurgical or posttraumatic pain. *Pain* 2019; 160:45–52
- Richeb   P, Capdevila X, Rivat C: Persistent postsurgical pain: Pathophysiology and preventative pharmacologic considerations. *ANESTHESIOLOGY* 2018; 129:590–607
- Penny KI, Purves AM, Smith BH, Chambers WA, Smith WC: Relationship between the chronic pain grade and measures of physical, social and psychological well-being. *Pain* 1999; 79:275–9
- Smith BH, Elliott AM, Chambers WA, Smith WC, Hannaford PC, Penny K: The impact of chronic pain in the community. *Fam Pract* 2001; 18:292–9
- Von Korff M, Dworkin F, Le Resche L: Graded chronic pain status: An epidemiologic. *Pain* 1990; 40:279–91
- Gureje O, Von Korff M, Simon GE, Gater R: Persistent pain and well-being: A World Health Organization Study in primary care. *JAMA* 1998; 280:147–51
- Bair MJ, Robinson RL, Katon W, Kroenke K: Depression and pain comorbidity: A literature review. *Arch Intern Med* 2003; 163:2433–45
- Karp JF, Scott J, Houck P, Reynolds CF III, Kupfer DJ, Frank E: Pain predicts longer time to remission during treatment of recurrent depression. *J Clin Psychiatry* 2005; 66:591–7
- Stewart WF, Ricci JA, Chee E, Morganstein D, Lipton R: Lost productive time and cost due to common pain conditions in the US workforce. *JAMA* 2003; 290:2443–54
- Pag   MG, Kudrina I, Zomahoun HTV, Croteau J, Ziegler D, Ngangue P, Martin E, Fortier M, Boisvert EE, Beaulieu P, Charbonneau C, Cogan J, Daoust R, Martel MO, N  ron A, Richeb   P, Clarke H: A systematic review of the relative frequency and risk factors for prolonged opioid prescription following surgery and trauma among adults. *Ann Surg* 2020; 271:845–54
- Kehlet H, Jensen TS, Woolf CJ: Persistent postsurgical pain: Risk factors and prevention. *Lancet* 2006; 367:1618–25
- Visser EJ: Chronic post-surgical pain: Epidemiology and clinical implications for acute pain management. *Acute Pain* 2006; 8:73–81
- Devereaux P, Chan M, Alonso-Coello P, Walsh M, Berwanger O, Villar J, Al E: Association between post-operative troponin levels and 30-day mortality among patients undergoing noncardiac surgery. *J Am Med Assoc* 2012; 307:2295–304
- Peduzzi P, Concato J, Kemper E, Holford TR, Feinstein AR: A simulation study of the number of events per variable in logistic regression analysis. *J Clin Epidemiol* 1996; 49:1373–9
- Kline R: Data preparation and screening, Principles and Practice of Structural Equation Modeling. New York, Guilford Press, 1998
- Steyerberg E: Overfitting and optimism, Clinical Prediction Models: A Practical Approach to Development, Validation, and Updating. New York, Springer, 2009
- Hoofwijk DM, Fiddelaers AA, Peters ML, Stessel B, Kessels AG, Joosten EA, Gramke HF, Marcus MA: Prevalence and predictive factors of chronic postsurgical pain and poor global recovery 1 year after outpatient surgery. *Clin J Pain* 2015; 31:1017–25
- Sansone P, Pace MC, Passavanti MB, Pota V, Colella U, Aurilio C: Epidemiology and incidence of acute and chronic post-surgical pain. *Ann Ital Chir* 2015; 86:285–92
- Schug SA, Bruce J: Risk stratification for the development of chronic postsurgical pain. *Pain Rep* 2017; 2:e627
- Werner MU, Kongsgaard UE: I. Defining persistent post-surgical pain: Is an update required? *Br J Anaesth* 2014; 113:1–4
- Khan JS, Ladha KS, Abdallah F, Clarke H: Treating persistent pain after breast cancer surgery. *Drugs* 2020; 80:23–31
- Wang L, Cohen JC, Devasenapathy N, Hong BY, Kheysan S, Lu D, Oparin Y, Kennedy SA, Romerosa B, Arora N, Kwon HY, Jackson K, Prasad M, Jayasekera D, Li A, Guarna G, Natalwalla S, Couban RJ, Reid S, Khan JS, McGillion M, Busse JW: Prevalence and intensity of persistent post-surgical pain following breast cancer surgery: A systematic review and meta-analysis of observational studies. *Br J Anaesth* 2020; 125:346–57
- Poobalan AS, Bruce J, King PM, Chambers WA, Krukowski ZH, Smith WC: Chronic pain and quality of life following open inguinal hernia repair. *Br J Surg* 2001; 88:1122–6
- Hinrichs-Rocker A, Schulz K, J  rvinen I, Lefering R, Simanski C, Neugebauer EA: Psychosocial predictors and correlates for chronic post-surgical pain (CPSP): A systematic review. *Eur J Pain* 2009; 13:719–30
- Gerbershagen HJ, Ozg  r E, Dagtekin O, Straub K, Hahn M, Heidenreich A, Sabatowski R, Petzke F: Preoperative pain as a risk factor for chronic post-surgical pain: Six month follow-up after radical prostatectomy. *Eur J Pain* 2009; 13:1054–61

27. Gärtner R, Jensen MB, Nielsen J, Ewertz M, Kroman N, Kehlet H: Prevalence of and factors associated with persistent pain following breast cancer surgery. *JAMA* 2009; 302:1985–92
28. Maguire MF, Ravenscroft A, Beggs D, Duffy JP: A questionnaire study investigating the prevalence of the neuropathic component of chronic pain after thoracic surgery. *Eur J Cardiothorac Surg* 2006; 29:800–5
29. Massaron S, Bona S, Fumagalli U, Battafarano F, Elmore U, Rosati R: Analysis of post-surgical pain after inguinal hernia repair: A prospective study of 1,440 operations. *Hernia* 2007; 11:517–25
30. Wildgaard K, Ravn J, Kehlet H: Chronic post-thoracotomy pain: A critical review of pathogenic mechanisms and strategies for prevention. *Eur J Cardiothorac Surg* 2009; 36:170–80
31. Althaus A, Hinrichs-Rocker A, Chapman R, Arránz Becker O, Lefering R, Simanski C, Weber F, Moser KH, Joppich R, Trojan S, Gutzeit N, Neugebauer E: Development of a risk index for the prediction of chronic post-surgical pain. *Eur J Pain* 2012; 16:901–10
32. Khan JS, Devereaux PJ, LeManach Y, Busse JW: Patient coping and expectations about recovery predict the development of chronic post-surgical pain after traumatic tibial fracture repair. *Br J Anaesth* 2016; 117:365–70
33. Chan MYP, Hamamura T, Janschewitz K: Ethnic differences in physical pain sensitivity: Role of acculturation. *Pain* 2013; 154:119–23
34. Lu Q, Zeltzer L, Tsao J: Multiethnic differences in responses to laboratory pain stimuli among children. *Health Psychol* 2013; 32:905–14
35. Ahn H, Weaver M, Lyon DE, Kim J, Choi E, Staud R, Fillingim RB: Differences in clinical pain and experimental pain sensitivity between Asian Americans and whites with knee osteoarthritis. *Clin J Pain* 2017; 33:174–80
36. Hsieh AY, Tripp DA, Ji LJ, Sullivan MJ: Comparisons of catastrophizing, pain attitudes, and cold-pressor pain experience between Chinese and European Canadian young adults. *J Pain* 2010; 11:1187–94
37. Rahim-Williams B, Riley JL III, Williams AK, Fillingim RB: A quantitative review of ethnic group differences in experimental pain response: Do biology, psychology, and culture matter? *Pain Med* 2012; 13:522–40
38. Watson PJ, Latif RK, Rowbotham DJ: Ethnic differences in thermal pain responses: A comparison of South Asian and white British healthy males. *Pain* 2005; 118:194–200
39. Al-Hashimi M, Scott S, Griffin-Teall N, Thompson J: Influence of ethnicity on the perception and treatment of early post-operative pain. *Br J Pain* 2015; 9:167–72
40. Katz J, Jackson M, Kavanagh BP, Sandler AN: Acute pain after thoracic surgery predicts long-term post-thoracotomy pain. *Clin J Pain* 1996; 12:50–5
41. Gibbons CH, Freeman R: Treatment-induced neuropathy of diabetes: An acute, iatrogenic complication of diabetes. *Brain* 2015; 138:43–52
42. Chapman CR, Vierck CJ: The transition of acute post-operative pain to chronic pain: An integrative overview of research on mechanisms. *J Pain* 2017; 18:359.e1–38
43. Gilron I, Vandenkerkhof E, Katz J, Kehlet H, Carley M: Evaluating the association between acute and chronic pain after surgery: Impact of pain measurement methods. *Clin J Pain* 2017; 33:588–94
44. Pagé MG, Katz J, Romero Escobar EM, Lutzky-Cohen N, Curtis K, Fuss S, Clarke HA: Distinguishing problematic from nonproblematic postsurgical pain: A pain trajectory analysis after total knee arthroplasty. *Pain* 2015; 156:460–8

## Appendix

**Table A1.** Patient Characteristics of Those with Mild, Moderate, and Severe Pain in Those with Persistent Incisional Pain

| Variables                                    | Mild Pain<br>(Pain Scores 0 to 3; n = 251) | Moderate Pain<br>(Pain Scores 4 to 6; n = 170) | Severe Pain<br>(Pain Scores 7 to 10; n = 66) |
|----------------------------------------------|--------------------------------------------|------------------------------------------------|----------------------------------------------|
| Mean age, yr (SD)                            | 68.0 (10.6)                                | 64.7 (9.9)                                     | 64.8 (8.4)                                   |
| Female sex, no. (%)                          | 144 (50.5)                                 | 102 (60.0)                                     | 36 (54.5)                                    |
| Mean body mass index, kg/m <sup>2</sup> (SD) | 27.8 (6.9)                                 | 28.6 (7.0)                                     | 29.7 (6.7)                                   |
| Diabetes, no. (%)                            | 58 (23.1)                                  | 30 (17.6)                                      | 13 (19.7)                                    |
| Active cancer, no. (%)                       | 42 (16.7)                                  | 12 (7.1)                                       | 4 (6.1)                                      |
| History of tobacco use, no. (%)              | 108 (43.4)                                 | 87 (51.2)                                      | 41 (62.1)                                    |
| Coronary artery disease, no. (%)             | 44 (17.7)                                  | 25 (14.7)                                      | 11 (16.7)                                    |
| Peripheral vascular disease, no. (%)         | 13 (5.2)                                   | 14 (8.2)                                       | 4 (6.1)                                      |
| History of chronic pain, no. (%)             | 48 (19.1)                                  | 41 (24.1)                                      | 19 (28.8)                                    |

Pain scores indicate the patient rating of pain on a numeric rating scale from 0 to 10.

**Table A2.** Neuropathic Pain Characteristics in Those with Persistent Incisional Pain

| Pain Characteristic     | Number Reporting<br>Pain, no. (%) | Score 0 to 10,<br>Mean (SD) |
|-------------------------|-----------------------------------|-----------------------------|
| Increased pain to touch | 284 (57.4)                        | 2.7 (3.1)                   |
| Numbness                | 233 (47.1)                        | 2.1 (2.9)                   |
| Tingling                | 193 (39.6)                        | 1.8 (2.8)                   |

**Table A3.** Impact of Medications Taken for Persistent Incisional Pain on Aspects of Daily Living

| Aspect of Daily Life | Medications for<br>Incisional Pain | Scale 0 to 10,<br>Mean (SD) |
|----------------------|------------------------------------|-----------------------------|
| General activity     | Yes                                | 4.7 (3.3)*                  |
|                      | No                                 | 2.0 (2.7)                   |
| Mood                 | Yes                                | 4.0 (3.3)*                  |
|                      | No                                 | 1.7 (2.4)                   |
| Walking activity     | Yes                                | 4.6 (3.4)*                  |
|                      | No                                 | 2.2 (2.8)                   |
| Normal work          | Yes                                | 4.8 (3.7)*                  |
|                      | No                                 | 2.0 (2.8)                   |
| Relations            | Yes                                | 2.7 (3.3)*                  |
|                      | No                                 | 1.0 (2.0)                   |
| Sleep                | Yes                                | 4.1 (3.3)*                  |
|                      | No                                 | 1.9 (2.8)                   |
| Enjoyment of life    | Yes                                | 3.9 (3.4)*                  |
|                      | No                                 | 1.6 (2.4)                   |

\* $P < 0.001$ .



**Table A4.** Adjusted Risks Odds Ratios of Perioperative Variables to Predict Persistent Incisional Pain

|                                                                                    | Frequency of<br>Those with<br>Persistent Pain, % | Absolute<br>Risk Difference<br>(95% CI) | Adjusted<br>Odds Ratio<br>(95% CI) | P Values |
|------------------------------------------------------------------------------------|--------------------------------------------------|-----------------------------------------|------------------------------------|----------|
| Active cancer                                                                      | 60 (12.1)                                        | −0.1 (−0.5 to 0.5)                      | 0.97 (0.72 to 1.32)                | 0.868    |
| African ethnicity                                                                  | 23 (4.6)                                         | 0.5 (−0.3 to 1.8)                       | 1.29 (0.8 to 2.08)                 | 0.297    |
| Age, decades                                                                       |                                                  | −0.6 (−0.7 to −0.5)                     | 0.66 (0.6 to 0.73)                 | < 0.001  |
| Arabic/Persian ethnicity                                                           | 2 (0.4)                                          | −0.6 (−1.4 to 0.2)                      | 0.63 (0.15 to 2.62)                | 0.530    |
| Aspirin less than 24 h preoperative and 1 to 7 days preoperative                   | 25 (5.1)                                         | −0.3 (−0.8 to 0.5)                      | 0.81 (0.5 to 1.32)                 | 0.399    |
| Aspirin less than 24 h preoperative, none 1 to 7 days preoperative                 | 2 (0.4)                                          | 2.5 (−0.9 to 17.1)                      | 2.51 (0.47 to 13.35)               | 0.280    |
| Aspirin 1 to 7 days preoperative, none less than 24 h preoperative                 | 46 (9.3)                                         | −0.1 (−0.6 to 0.6)                      | 0.95 (0.67 to 1.36)                | 0.799    |
| Asian ethnicity                                                                    | 147 (29.7)                                       | 4.6 (3.2 to 6.3)                        | 3.88 (2.98 to 5.06)                | < 0.001  |
| Body mass index                                                                    |                                                  | 0 (−0.02 to 0.02)                       | 1 (0.99 to 1.01)                   | 0.989    |
| Cyclooxygenase-2 less than 24 h preoperative and 1 to 7 days preoperative          | 7 (1.4)                                          | 0.1 (−0.9 to 2.4)                       | 1.05 (0.45 to 2.49)                | 0.907    |
| Cyclooxygenase-2 less than 24 h preoperative, none 1 to 7 days preoperative        | 2 (0.4)                                          | −0.8 (−1.5 to 2)                        | 0.53 (0.13 to 2.22)                | 0.385    |
| Cyclooxygenase-2 1 to 7 days preoperative, none less than 24 h preoperative        | 24 (4.8)                                         | 1.8 (0.5 to 3.9)                        | 2.12 (1.32 to 3.41)                | 0.002    |
| Oral hypoglycemia agent less than 24 h preoperative and 1 to 7 days preoperative   | 21 (4.2)                                         | −0.4 (−1 to 0.7)                        | 0.76 (0.41 to 1.4)                 | 0.378    |
| Oral hypoglycemia agent less than 24 h preoperative, none 1 to 7 days preoperative | 0 (0)                                            | 0 (0 to 0)                              | 0 (0 to 0)                         | 0.998    |
| Oral hypoglycemia agent 1 to 7 days preoperative, none less than 24 h preoperative | 52 (10.5)                                        | 0.2 (−0.5 to 1.5)                       | 1.14 (0.68 to 1.91)                | 0.618    |
| Postoperative epidural local analgesia                                             | 43 (8.7)                                         | 0.4 (−0.6 to 2.4)                       | 1.27 (0.66 to 2.47)                | 0.475    |
| Endoscopic surgery                                                                 | 91 (18.4)                                        | −0.4 (−0.7 to 0.1)                      | 0.78 (0.59 to 1.03)                | 0.076    |
| Otolaryngologic surgeries                                                          | 7 (1.4)                                          | 0.7 (−0.7 to 4.1)                       | 1.45 (0.59 to 3.57)                | 0.424    |
| Postoperative epidural opioid analgesia                                            | 41 (8.3)                                         | −0.1 (−0.9 to 1.5)                      | 0.95 (0.47 to 1.9)                 | 0.886    |
| Intraoperative epidural anesthesia                                                 | 57 (11.5)                                        | 0.6 (−0.3 to 2)                         | 1.39 (0.85 to 2.25)                | 0.185    |
| Female sex                                                                         | 286 (57.8)                                       | 0.4 (0.1 to 0.9)                        | 1.27 (1.04 to 1.57)                | 0.022    |
| General surgery                                                                    | 97 (19.6)                                        | 0.4 (−0.4 to 1.9)                       | 1.27 (0.76 to 2.14)                | 0.360    |
| History of coronary artery disease                                                 | 83 (16.8)                                        | 1.6 (0.8 to 2.7)                        | 1.99 (1.48 to 2.68)                | < 0.001  |
| History of chronic pain                                                            | 109 (22.0)                                       | 1.4 (0.7 to 2.2)                        | 1.83 (1.43 to 2.34)                | < 0.001  |
| History of diabetes                                                                | 102 (20.6)                                       | −0.1 (−0.7 to 0.8)                      | 0.96 (0.61 to 1.51)                | 0.862    |
| History of peripheral vascular disease                                             | 32 (6.5)                                         | 0.3 (−0.5 to 1.7)                       | 1.21 (0.73 to 2.01)                | 0.450    |
| History of tobacco use                                                             | 239 (48.3)                                       | 0.4 (0 to 0.9)                          | 1.23 (0.99 to 1.52)                | 0.058    |
| Postoperative IM/IV opioids                                                        | 226 (45.7)                                       | 0.2 (−0.1 to 0.6)                       | 1.13 (0.92 to 1.39)                | 0.241    |
| Insulin less than 24 h preoperative and 1 to 7 days preoperative                   | 23 (4.6)                                         | 0 (−0.7 to 1.2)                         | 0.99 (0.58 to 1.7)                 | 0.980    |
| Insulin less than 24 h preoperative, none 1 to 7 days preoperative                 | 25 (5.1)                                         | 1.5 (0.1 to 3.8)                        | 1.89 (1.05 to 3.39)                | 0.033    |
| Insulin 1 to 7 days preoperative, none less than 24 h preoperative                 | 4 (0.8)                                          | −0.9 (−1.5 to 0.8)                      | 0.44 (0.13 to 1.47)                | 0.183    |
| Latin/Hispanic ethnicity                                                           | 10 (2.0)                                         | −1.3 (−1.5 to −1)                       | 0.21 (0.11 to 0.41)                | < 0.001  |
| Low-risk surgeries                                                                 | 152 (30.7)                                       | 0.2 (−0.5 to 1.4)                       | 1.11 (0.68 to 1.83)                | 0.679    |
| Native American/Australian ethnicity                                               | 6 (1.2)                                          | −1 (−1.4 to 0)                          | 0.43 (0.19 to 0.98)                | 0.046    |
| Intraoperative regional anesthesia                                                 | 41 (8.3)                                         | −0.1 (−0.6 to 0.7)                      | 0.95 (0.64 to 1.41)                | 0.788    |
| Postoperative continuous nerve block                                               | 13 (2.6)                                         | 1.1 (−0.2 to 3.6)                       | 1.67 (0.86 to 3.22)                | 0.127    |
| Neurosurgical                                                                      | 47 (9.5)                                         | 1.1 (−0.2 to 3.2)                       | 1.64 (0.9 to 3)                    | 0.109    |
| Intraoperative nitrous oxide                                                       | 33 (6.7)                                         | 0.3 (−0.4 to 1.3)                       | 1.19 (0.79 to 1.8)                 | 0.396    |
| NSAID less than 24 h preoperative and 1 to 7 days preoperative                     | 14 (2.8)                                         | −0.4 (−1 to 0.5)                        | 0.74 (0.42 to 1.29)                | 0.290    |
| NSAID less than 24 h preoperative, none 1 to 7 days preoperative                   | 25 (5.5)                                         | 0.5 (−0.4 to 1.8)                       | 1.28 (0.79 to 2.08)                | 0.320    |
| NSAID 1 to 7 days preoperative, none less than 24 h preoperative                   | 30 (6.1)                                         | 1 (0.1 to 2.4)                          | 1.63 (1.07 to 2.47)                | 0.023    |
| Orthopedic surgeries                                                               | 143 (28.9)                                       | 0.9 (−0.2 to 2.9)                       | 1.56 (0.88 to 2.77)                | 0.127    |
| Other ethnicity                                                                    | 2 (0.4)                                          | −0.9 (−1.5 to 1.6)                      | 0.48 (0.12 to 1.98)                | 0.312    |
| Postoperative PCA                                                                  | 207 (41.8)                                       | 0.9 (0.4 to 1.6)                        | 1.55 (1.23 to 1.96)                | < 0.001  |
| South Asian ethnicity                                                              | 34 (6.9)                                         | −1 (−1.3 to −0.6)                       | 0.39 (0.25 to 0.63)                | < 0.001  |
| Intraoperative spinal anesthesia                                                   | 129 (26.1)                                       | 0.1 (−0.3 to 0.8)                       | 1.08 (0.8 to 1.46)                 | 0.622    |
| Surgery for fracture                                                               | 36 (7.3)                                         | 1.6 (0.6 to 3.2)                        | 1.99 (1.34 to 2.96)                | 0.001    |
| Thoracic surgery                                                                   | 14 (2.8)                                         | 1.2 (−0.3 to 4.3)                       | 1.75 (0.83 to 3.69)                | 0.138    |
| Urologic–gynecologic surgeries                                                     | 36 (7.3)                                         | −0.7 (−1.1 to 0)                        | 0.61 (0.37 to 1.01)                | 0.052    |
| Vascular surgery                                                                   | 18 (3.6)                                         | −0.1 (−0.9 to 1.7)                      | 0.96 (0.45 to 2.06)                | 0.914    |

IM, intramuscular; IV, intravenous; NSAID, nonsteroidal anti-inflammatory drug; PCA, patient-controlled analgesia.
